# Supplementary material
Source: HighWire-hosted journal article supplement (https://jaapl.org/content/JAAPL.200022-20)
Supplement: inline-supplementary-material-1 [file inline-supplementary-material-1.pdf]

S U P P L E M E N T A L M A T E R I A L

---

J Am Acad Psychiatry Law 48:S1–S13, 2020. DOI:10.29158/JAAPL.200026-20

## METHODS

### Locations

During the study period (January 1, 2014 to December 31, 2018), psychiatrists in the emergency room conducted 30,336 initial patient evaluations. Most of the patients on the inpatient psychiatric units were admitted there from the psychiatry emergency room, with some patients transferred from medical/surgical services, admitted from outside hospitals, or directly admitted by outpatient providers. During the study period, 1,568 patients were admitted from the psychiatry emergency room to one inpatient unit, and 1,972 patients were admitted from the psychiatry emergency room to the other inpatient unit. Data were not available regarding the number of patients admitted to the inpatient units from locations other than the psychiatry emergency room.

### Exclusion Criteria for Incident Reports

A small number of incident reports were excluded from the analysis as they were judged to be out of scope because they did not involve any allegation of a patient in the psychiatry emergency room or the inpatient units becoming aggressive or violent toward another person. One incident report was excluded because the incident occurred in the outpatient psychiatry clinic. One report was excluded because the patient self-injured but did not assault anybody else. Three reports involved patient complaints about staff.

### Variables Defined

Several event characteristics were defined prior to data collection and extracted for quantitative study (Supplemental Table 1).

**Table S1** Quantitative Descriptors of Assault Events

| Variable                        | Description                                                                                                                                                                                                                                                                                             |
|---------------------------------|---------------------------------------------------------------------------------------------------------------------------------------------------------------------------------------------------------------------------------------------------------------------------------------------------------|
| Hospital day                    | On what hospital day did the assailant commit his or her first assault? Day of presentation is day 0.                                                                                                                                                                                                   |
| Event weekday                   | On what day of the week did the assault occur?                                                                                                                                                                                                                                                          |
| Event time                      | At what time of day did the assault occur?                                                                                                                                                                                                                                                              |
| Event location                  | On what unit did the assault occur?                                                                                                                                                                                                                                                                     |
| Involved parties                | Who was assaulted? Categories were patient to patient, patient to staff, and patient to visitor.                                                                                                                                                                                                        |
| Means of assault                | Categories were punch, slap, grab, hair pull, scratch, kick, push, spit, bite, sexual misconduct, other mechanism. "Other mechanism" included a free-text option, which led to additional categories of projectile, tackle, charge/lunge, other, unspecified. A list of weaponized objects was created. |
| Assault severity                | The Modified Overt Aggression Scale was used.                                                                                                                                                                                                                                                           |
| Victims                         | Who was the victim? Categories were patient, security officer, attending doctor, resident doctor, medical student, physician's assistant or nurse practitioner, nurse, mental health worker or emergency room technician, and other.                                                                    |
| Interventions following assault | Categories were intramuscular antipsychotic, intramuscular benzodiazepine, oral antipsychotic, oral benzodiazepine, security involvement, manual hold, mechanical restraint, and seclusion.                                                                                                             |

### Physical Assault in Psychiatry Emergency Room - Supplemental Material

Two authors qualitatively analyzed the assault narratives, looking for antecedent themes or events that

were associated with subsequent assaultive behaviors according to the medical record.

**Table S2** Consolidated Criteria for Reporting Qualitative Studies (COREQ) Checklist<sup>a</sup>

| Item                                     | Guide Questions or Descriptions                                                                                                                             | Comment                                                                                                                                                                                                                                          |
|------------------------------------------|-------------------------------------------------------------------------------------------------------------------------------------------------------------|--------------------------------------------------------------------------------------------------------------------------------------------------------------------------------------------------------------------------------------------------|
| 1. Interviewer or facilitator            | Which authors conducted the chart reviews?                                                                                                                  | R. L. and S. R.                                                                                                                                                                                                                                  |
| 2. Credentials                           | What were the researcher's credentials?                                                                                                                     | R. L. and S. R. are board-certified psychiatrists.                                                                                                                                                                                               |
| 3. Occupation                            | What was their occupation at the time of the study?                                                                                                         | R. L. and S. R. are board-certified psychiatrists.                                                                                                                                                                                               |
| 4. Gender                                | Was the researcher male or female?                                                                                                                          | One is male, one is female.                                                                                                                                                                                                                      |
| 5. Experience and training               | What experience or training did the researcher have?                                                                                                        | The principal investigator has attended classes on qualitative methods, has done independent reading on qualitative methods (e.g., books and articles), and has prior experience designing and conducting multiple qualitative research studies. |
| 6. Relationship established              | Was a relationship established prior to study commencement?                                                                                                 | Not applicable – qualitative analysis was applied to preexisting medical records.                                                                                                                                                                |
| 7. Subject knowledge of the interviewer  | What did the participants know about the researcher (e.g., personal goals, reasons for doing the research)?                                                 | Not applicable – qualitative analysis was applied to preexisting medical records.                                                                                                                                                                |
| 8. Interviewer characteristic            | What characteristics were reported about the interviewer (e.g., bias, assumptions, reasons, interests in the research topic)?                               | Not applicable – qualitative analysis was applied to preexisting medical records.                                                                                                                                                                |
| 9. Methodological orientation and theory | What methodological orientation was stated to underpin the study (e.g., grounded theory, discourse analysis, ethnography, phenomenology, content analysis)? | Grounded theory was the methodological orientation. Researchers allowed content and themes to emerge from the data contained in the records.                                                                                                     |
| 10. Sampling                             | How were subjects selected?                                                                                                                                 | All cases were persons involved in an assault while in the hospital during the study period.                                                                                                                                                     |
| 11. Method of approach                   | How were subjects approached? (e.g., face-to-face, telephone, mail, email)                                                                                  | Not applicable – qualitative analysis was applied to preexisting medical records.                                                                                                                                                                |
| 12. Sample size                          | How many subjects were in the study?                                                                                                                        | $n = 184$ assault events                                                                                                                                                                                                                         |
| 13. Nonparticipation                     | How many people refused to participate or dropped out? Reasons?                                                                                             | Not applicable – qualitative analysis was applied to preexisting medical records.                                                                                                                                                                |
| 14. Setting of data collection           | Where were the data collected?                                                                                                                              | Psychiatry emergency room and two inpatient psychiatry units                                                                                                                                                                                     |
| 15. Presence of nonparticipants          | Was anyone else present besides the subjects and researchers?                                                                                               | Not applicable – qualitative analysis was applied to preexisting medical records.                                                                                                                                                                |
| 16. Description of sample                | What are the important characteristics of the sample?                                                                                                       | The sample is described in Results.                                                                                                                                                                                                              |
| 17. Interview guide                      | Were questions, prompts, guides provided by the authors? Was it pilot tested?                                                                               | Not applicable – qualitative analysis was applied to preexisting medical records.                                                                                                                                                                |
| 18. Repeat interviews                    | Were repeat interviews carried out? If yes, how many?                                                                                                       | Not applicable – qualitative analysis was applied to preexisting medical records.                                                                                                                                                                |
| 19. Audio/visual recording               | Did the research use audio or visual recording to collect the data?                                                                                         | Not applicable – qualitative analysis was applied to preexisting medical records.                                                                                                                                                                |
| 20. Field notes                          | Were field notes made during and/or after the interview or focus group?                                                                                     | Not applicable – qualitative analysis was applied to preexisting medical records.                                                                                                                                                                |
| 21. Duration                             | What was the duration of the interviews?                                                                                                                    | Not applicable – qualitative analysis was applied to preexisting medical records.                                                                                                                                                                |
| 22. Data saturation                      | Was data saturation discussed?                                                                                                                              | See Methods.                                                                                                                                                                                                                                     |
| 23. Transcripts returned                 | Were transcripts returned to subjects for comment or correction?                                                                                            | Not applicable – qualitative analysis was applied to preexisting medical records.                                                                                                                                                                |
| 24. Number of data coders                | How many data coders coded the data?                                                                                                                        | Ryan Lawrence and Stephanie Rolin coded the data separately and discussed discrepancies until consensus was reached.                                                                                                                             |
| 25. Description of the coding tree       | Did authors provide a description of the coding tree?                                                                                                       | Codes are described in detail in Table S3, and a summary is provided in Results.                                                                                                                                                                 |

(Continued)

**Lawrence, Rolin, Looney, et al.****Table S2** Continued

| Item                             | Guide Questions or Descriptions                                                                                               | Comment                                                                                                                                                                                                 |
|----------------------------------|-------------------------------------------------------------------------------------------------------------------------------|---------------------------------------------------------------------------------------------------------------------------------------------------------------------------------------------------------|
| 26. Derivation of themes         | Were themes identified in advance or derived from the data?                                                                   | Themes were not identified in advance but were derived from the data.                                                                                                                                   |
| 27. Software                     | What software was used to manage the data?                                                                                    | Microsoft Word                                                                                                                                                                                          |
| 28. Subject checking             | Did subjects provide feedback on the findings?                                                                                | The study design did not allow subjects to provide feedback on the findings because this was a chart review for patients who had since been discharged and were no longer in treatment at the hospital. |
| 29. Quotations presented         | Were subject quotations presented to illustrate the themes/findings? Was each quotation identified (e.g., by subject number)? | This was not an interview study, so quotations were not applicable. Rather, paradigmatic examples were provided for each code.                                                                          |
| 30. Data and findings consistent | Was there consistency between the data presented and the findings?                                                            | See Results and Discussion.                                                                                                                                                                             |
| 31. Clarity of major themes      | Were major themes clearly presented in the findings?                                                                          | See Results and Discussion.                                                                                                                                                                             |
| 32. Clarity of minor themes      | Is there a description of diverse cases or discussion of minor themes?                                                        | See Results and Discussion.                                                                                                                                                                             |

<sup>a</sup>This checklist is modified in places to make it appropriate for this study's methodology.

Tong A, Sainsbury P, Craig J: Consolidated criteria for reporting qualitative research (COREQ): a 32-item checklist for interviews and focus groups. *Intl J Quality Health Care* 19:349–357, 2007.

**Physical Assault in Psychiatry Emergency Room - Supplemental Material****Table S3** Codes for Qualitative Themes Associated with Assault Incident Report

| Variable Name                           | Description                                                                                                                                                                                                                                                                     | Paradigmatic Examples                                                                                                               | First Incident with This Code <sup>a</sup> |
|-----------------------------------------|---------------------------------------------------------------------------------------------------------------------------------------------------------------------------------------------------------------------------------------------------------------------------------|-------------------------------------------------------------------------------------------------------------------------------------|--------------------------------------------|
| Admission/discharge dispute             | The patient disagrees with the clinical decision to admit or discharge the patient. This includes events related to court (for retention or treatment over objection).                                                                                                          | The patient wants immediate discharge.                                                                                              | #18                                        |
| Needs are not being met                 | The patient feels that staff are not addressing a need quickly enough or are unwilling/unable to provide what the patient is requesting.                                                                                                                                        | Patient demands opioids for pain.                                                                                                   | #1                                         |
| Dislike of unit rules or structure      | The patient is upset about a rule or structure on the unit. This includes times when staff redirect the patient and the patient escalates.                                                                                                                                      | Patient is asked not to stand next to a door.                                                                                       | #1                                         |
| Dispute over limited resources          | A patient wants to use a resource that another patient is using.                                                                                                                                                                                                                | Two patients want to use the same computer at the same time.                                                                        | #2                                         |
| Dispute over personal space or property | A patient feels his/her personal space has been violated or his/her personal property has been taken.                                                                                                                                                                           | A patient is in the wrong bed, a patient enters the wrong room, or roommates disagree on whether the door should be open or closed. | #6                                         |
| Annoyed by behavior on the unit         | One patient is annoyed by another patient's behavior.                                                                                                                                                                                                                           | A patient is talking loudly and constantly, which is bothering many on the floor and ultimately triggers an assault.                | #21                                        |
| Food                                    | The assault was triggered by an event related to food                                                                                                                                                                                                                           | Staff threw away food a patient was intending to eat.                                                                               | #7                                         |
| Taunting                                | Patients engage in verbally provocative statements that are not a direct challenge to fight (e.g., teasing, swearing/cursing, or behaviors that are experienced as insulting or provocative).                                                                                   | One patient calls another patient a derogatory name.                                                                                | #1                                         |
| Direct challenge to fight               | A verbal or physical exchange where there is a direct challenge to fight.                                                                                                                                                                                                       | One patient challenges another patient to fight.                                                                                    | #21                                        |
| Bodily integrity                        | The patient believed another person or staff member was about to inflict harm. This includes self-defense and assaults that happen during intramuscular injections or restraint episodes.                                                                                       | Patient thinks he/she is about to be attacked.                                                                                      | #100                                       |
| Defending others                        | The patient acted in an effort to protect someone else from a perceived threat.                                                                                                                                                                                                 | Patient thinks someone else is about to be attacked.                                                                                | #15                                        |
| Perceptual disturbance                  | Notes describe internal preoccupation, auditory hallucinations, or visual hallucinations that are directly connected with assaultive behavior.                                                                                                                                  | Command auditory hallucinations to hurt others.                                                                                     | #7                                         |
| Paranoia                                | This code is reserved for times when the chart specifically mentions paranoia and the paranoia is directly connected to the assaultive behavior. This includes events where the person believes someone is talking about him/her or does not like how someone looks at him/her. | Patient complains that a person is talking about him/her and then assaults that person.                                             | #3                                         |
| Disorganization                         | The assault seems unexpected, unpredictable, or random despite adequate documentation. Psychosis, delirium, intoxication, or developmental delay might contribute to disorganization.                                                                                           | Assault is unprovoked and accompanied by other nonsensical behavior.                                                                | #7                                         |
| Retaliation                             | The assault was payback for something that happened earlier.                                                                                                                                                                                                                    | Assault is a response to an argument that started the previous day.                                                                 | #2                                         |
| Sexuality                               | The patient engaged in or witnessed sexually themed behaviors.                                                                                                                                                                                                                  | Patient feels a romantic connection with a staff member and touches the staff member inappropriately or targets a perceived rival.  | #4                                         |

(Continued)

**Lawrence, Rolin, Looney, et al.****Table S3** Continued

| Variable Name               | Description                                                                                                                                                          | Paradigmatic Examples                                                                                                                    | First Incident with This Code <sup>a</sup> |
|-----------------------------|----------------------------------------------------------------------------------------------------------------------------------------------------------------------|------------------------------------------------------------------------------------------------------------------------------------------|--------------------------------------------|
| Family involvement          | A recent, current, or future family meeting or visit is part of the trigger. This includes patients with intellectual disability who are asking for a family member. | Assault happens after a family visit.                                                                                                    | #1                                         |
| Phenomenological escalation | Play fighting becomes actual fighting.                                                                                                                               | Patients are shadow-boxing, then start real boxing.                                                                                      | #11                                        |
| Accidental assault          | The assault is accidental or the assailant is targeting person #1, but person #2 is the actual victim.                                                               | Person is flailing arms without targeting anybody in particular, or staff are keeping two patients apart but a staff member gets pushed. | #105                                       |
| No identifiable narrative   | No narrative is identifiable because documentation is too brief or staff did not report any narrative.                                                               | Patient is not described as disorganized, but no clear narrative is mentioned.                                                           | #5                                         |

<sup>a</sup>The first 20 incidents were numbered #1–22; there are missing incident numbers because some reports were consolidated if they referred to a single incident, and a few incident reports were excluded if they were out of scope. Ninety percent of the codes appeared in the first 20 incidents. There were a total of 184 incidents.

**Physical Assault in Psychiatry Emergency Room - Supplemental Material****Table S4** Patient Characteristics

| Variable Name                             | Description                                                                 | Original Categories                                                                                                            | Final Categories                                                                                                         |
|-------------------------------------------|-----------------------------------------------------------------------------|--------------------------------------------------------------------------------------------------------------------------------|--------------------------------------------------------------------------------------------------------------------------|
| Sex                                       | Sex                                                                         | Male<br>Female<br>Other (included transgender, gender queer, and gender nonbinary patients, $n = 5$ )                          | Male<br>Female<br>(Other was recoded as male or female based on the person's self-identified sex or preferred pronouns.) |
| Age                                       | Age in years                                                                | Number                                                                                                                         | Number                                                                                                                   |
| Homeless                                  | Is the person homeless at the time of presentation?                         | Stable housing<br>Street homeless<br>Shelter resident<br>Unclear housing                                                       | Housed: stable housing<br><br>Homeless: street homeless, shelter resident, unclear housing                               |
| Employment                                | Is the person employed?                                                     | Yes (includes off-the-books employment and students)<br>No<br>Unknown                                                          | Employed<br><br>Unemployed<br>(Unknown was coded as missing.)                                                            |
| Prior arrest                              | Does the chart indicate prior arrests?                                      | Yes (includes any incarceration history)<br>No<br>Unknown                                                                      | Yes<br>No<br>(Unknown was coded as missing.)                                                                             |
| State hospitalization                     | Has the person been hospitalized at a long-term state psychiatric hospital? | Yes<br>No<br>Unknown                                                                                                           | Yes<br>No<br>(Unknown was coded as missing.)                                                                             |
| Assertive Community Treatment (ACT) team  | Does the person have an ACT team at the time of presentation?               | Yes<br>No<br>Unknown                                                                                                           | Yes<br>No<br>(Unknown was coded as missing.)                                                                             |
| Assisted Outpatient Treatment (AOT) order | Does the person have an AOT order at the time of presentation?              | Yes<br>No<br>Unknown                                                                                                           | Yes<br>No<br>(Unknown was coded as missing.)                                                                             |
| Prior hospitalization                     | How many prior psychiatric hospitalizations were reported?                  | 0<br>1<br>2+<br>Unknown                                                                                                        | 0–1<br>2+<br>(Unknown was coded as missing.)                                                                             |
| Violence history                          | Is there a history of violence?                                             | Yes<br>No<br>Unknown                                                                                                           | Yes<br>No<br>(Unknown was coded as missing.)                                                                             |
| Thoughts to harm self                     | Did the presentation include thoughts of hurting self?                      | Yes (includes suicide ideation, suicide attempts, non-suicidal self-harm, and intentional overdoses)<br>No<br>Other<br>Unknown | Yes<br><br>No<br>(Other and unknown were coded as missing.)                                                              |
| Thoughts to harm others                   | Did the presentation include thoughts of hurting others?                    | Yes (includes persons who were brought to the hospital due to aggressive behaviors)<br>No<br>Unknown                           | Yes<br><br>No<br>(Unknown was coded as missing.)                                                                         |
| Recent alcohol use                        | Alcohol use within 2 weeks of presentation, or blood alcohol level $> 10$   | Yes<br>No                                                                                                                      | Yes<br>No                                                                                                                |
| Recent marijuana use                      | Marijuana use within 2 weeks of presentation, or positive urine toxicology  | Yes<br>No                                                                                                                      | Yes<br>No                                                                                                                |

(Continued)

## Lawrence, Rolin, Looney, et al.

Table S4 Continued

| Variable Name                                        | Description                                                                                                                                   | Original Categories                   | Final Categories                                       |
|------------------------------------------------------|-----------------------------------------------------------------------------------------------------------------------------------------------|---------------------------------------|--------------------------------------------------------|
| Recent synthetic cannabinoid use                     | Synthetic cannabinoid (e.g., K2) use within 2 weeks of presentation                                                                           | Yes                                   | Yes                                                    |
|                                                      |                                                                                                                                               | No                                    | No                                                     |
| Recent cocaine use                                   | Cocaine use within 2 weeks of presentation, or positive urine toxicology                                                                      | Yes                                   | Yes                                                    |
|                                                      |                                                                                                                                               | No                                    | No                                                     |
| Recent amphetamine use                               | Recent (within 2 weeks of presentation) use of crystal methamphetamine, mixed amphetamine salt (e.g., Adderall), or positive urine toxicology | Yes                                   | Yes                                                    |
|                                                      |                                                                                                                                               | No                                    | No                                                     |
| Recent PCP use                                       | PCP (i.e., angeldust) use within 2 weeks of presentation, or positive urine toxicology                                                        | Yes                                   | Yes                                                    |
|                                                      |                                                                                                                                               | No                                    | No                                                     |
| Recent opiate use                                    | Any opiate use within 2 weeks of presentation, or positive urine toxicology                                                                   | Yes                                   | Yes                                                    |
|                                                      |                                                                                                                                               | No                                    | No                                                     |
| Recent other drug use <sup>a</sup>                   | Other drug use within 2 weeks of presentation (includes MDMA/ecstasy, Zolpidem, GHB, and unspecified intravenous drug use)                    | Yes                                   | Yes                                                    |
|                                                      |                                                                                                                                               | No                                    | No                                                     |
| Any recent drug use                                  | Composite variable separating persons who used any substance within 2 weeks of presentation from non-users                                    | Recent alcohol (yes/no)               | Yes                                                    |
|                                                      |                                                                                                                                               | Recent marijuana (yes/no)             | No                                                     |
|                                                      |                                                                                                                                               | Recent synthetic cannabinoid (yes/no) |                                                        |
|                                                      |                                                                                                                                               | Recent cocaine (yes/no)               |                                                        |
|                                                      |                                                                                                                                               | Recent amphetamines (yes/no)          |                                                        |
|                                                      |                                                                                                                                               | Recent PCP (yes/no)                   |                                                        |
|                                                      |                                                                                                                                               | Recent opiates (yes/no)               |                                                        |
| Schizophrenia, schizoaffective, or bipolar disorder  | Composite variable describing persons with schizophrenia, schizoaffective disorder, or bipolar disorder                                       | Recent other drug (yes/no)            |                                                        |
|                                                      |                                                                                                                                               | Schizophrenia (yes/no)                | None                                                   |
|                                                      |                                                                                                                                               | Schizoaffective manic (yes/no)        | Schizophrenia, schizoaffective, or bipolar – not manic |
|                                                      |                                                                                                                                               | Schizoaffective mixed (yes/no)        | Schizophrenia, schizoaffective, or bipolar – manic     |
|                                                      |                                                                                                                                               | Schizoaffective depressed (yes/no)    |                                                        |
|                                                      |                                                                                                                                               | Schizoaffective unspecified (yes/no)  |                                                        |
|                                                      |                                                                                                                                               | Bipolar manic (yes/no)                |                                                        |
|                                                      |                                                                                                                                               | Bipolar mixed (yes/no)                |                                                        |
|                                                      |                                                                                                                                               | Bipolar depressed (yes/no)            |                                                        |
|                                                      |                                                                                                                                               | Bipolar unspecified (yes/no)          |                                                        |
| Unipolar depression                                  | Unipolar depression                                                                                                                           | Yes                                   | Yes                                                    |
|                                                      |                                                                                                                                               | No                                    | No                                                     |
| Dementia                                             | Dementia                                                                                                                                      | Yes                                   | Yes                                                    |
|                                                      |                                                                                                                                               | No                                    | No                                                     |
| Intellectual disability                              | Intellectual disability                                                                                                                       | Yes                                   | Yes                                                    |
|                                                      |                                                                                                                                               | No                                    | No                                                     |
| Traumatic brain injury                               | History of traumatic brain injury                                                                                                             | Yes                                   | Yes                                                    |
|                                                      |                                                                                                                                               | No                                    | No                                                     |
| Borderline personality disorder traits or diagnosis  | Borderline personality disorder traits or diagnosis                                                                                           | Yes                                   | Yes                                                    |
|                                                      |                                                                                                                                               | No                                    | No                                                     |
| Antisocial personality disorder traits or diagnosis  | Antisocial traits or diagnosis                                                                                                                | Yes                                   | Yes                                                    |
|                                                      |                                                                                                                                               | No                                    | No                                                     |
| Unspecified personality disorder traits or diagnosis | Unspecified personality disorder traits or diagnosis                                                                                          | Yes                                   | Yes                                                    |
|                                                      |                                                                                                                                               | No                                    | No                                                     |

(Continued)

**Physical Assault in Psychiatry Emergency Room - Supplemental Material****Table S4** Continued

| Variable Name                                | Description                                                                                                                   | Original Categories                       | Final Categories |
|----------------------------------------------|-------------------------------------------------------------------------------------------------------------------------------|-------------------------------------------|------------------|
| Any personality disorder traits or diagnosis | Composite variable including all persons with borderline, antisocial, or unspecified personality disorder traits or diagnosis | Borderline (yes/no)                       | Yes              |
|                                              |                                                                                                                               | Antisocial (yes/no)                       | No               |
|                                              |                                                                                                                               | Unspecified personality disorder (yes/no) |                  |
| Posttraumatic stress disorder                | Diagnosis of posttraumatic stress disorder                                                                                    | Yes                                       | Yes              |
|                                              |                                                                                                                               | No                                        | No               |

<sup>a</sup> Benzodiazepines were not included because it was difficult to separate persons who used benzodiazepines in the two weeks prior to the hospitalization as outpatients versus persons who had received benzodiazepines during the current hospital course or a recent prior hospital or emergency room course.



## Lawrence, Rolin, Looney, et al.

## RESULTS

Table S5 Bivariate Analysis Comparing Incidents in the Psychiatry Emergency Room to Incidents on Inpatient Units

| Variable                         | Psych ER   | Inpatient   | Test                    | Statistic | P    | Degrees of Freedom |
|----------------------------------|------------|-------------|-------------------------|-----------|------|--------------------|
| <b>Involved parties</b>          |            |             | Chi square              | 1.3975    | .706 | 3                  |
| Patient to patient               | 16 (26.67) | 43 (34.68)  |                         |           |      |                    |
| Patient to staff                 | 42 (70.00) | 78 (62.90)  |                         |           |      |                    |
| Patient to visitor               | 1 (1.67)   | 2 (1.61)    |                         |           |      |                    |
| Patient to patient and visitor   | 1 (1.67)   | 1 (0.81)    |                         |           |      |                    |
| <b>Assault severity—all</b>      |            |             |                         |           |      |                    |
| MOAS 0                           | 0 (0)      | 0 (0)       |                         |           |      |                    |
| MOAS 1                           | 2 (3.33)   | 1 (0.81)    |                         |           |      |                    |
| MOAS 2                           | 34 (56.67) | 83 (66.94)  |                         |           |      |                    |
| MOAS 3                           | 24 (40.00) | 40 (32.26)  |                         |           |      |                    |
| MOAS 4                           | 0 (0)      | 0 (0)       |                         |           |      |                    |
| <b>Assault severity—combined</b> |            |             | Chi square              | 1.0684    | .301 | 1                  |
| MOAS 1–2                         | 36 (60.00) | 84 (67.74)  |                         |           |      |                    |
| MOAS 3                           | 24 (40.00) | 40 (32.26)  |                         |           |      |                    |
| <b>Time of Day—Psych ER</b>      |            |             | Chi square <sup>a</sup> | 2.9092    | .406 | 3                  |
| Midnight–6 a.m.                  | 8 (13.33)  | —           |                         |           |      |                    |
| 6 a.m.–noon                      | 16 (26.67) | —           |                         |           |      |                    |
| Noon–6 p.m.                      | 20 (33.33) | —           |                         |           |      |                    |
| 6 p.m.–midnight                  | 16 (26.7)  | —           |                         |           |      |                    |
| <b>Time of Day—Inpatient</b>     |            |             | Chi square <sup>a</sup> | 13.7354   | .003 | 3                  |
| Midnight–6 a.m.                  | —          | 10 (8.06)   |                         |           |      |                    |
| 6 a.m.–noon                      | —          | 38 (30.65)  |                         |           |      |                    |
| Noon–6 p.m.                      | —          | 44 (35.48)  |                         |           |      |                    |
| 6 p.m.–midnight                  | —          | 32 (25.81)  |                         |           |      |                    |
| <b>Weekday—Psych ER</b>          |            |             | Chi square <sup>a</sup> | .81928    | .992 | 6                  |
| Sunday                           | 8 (13.33)  | —           |                         |           |      |                    |
| Monday                           | 12 (20.00) | —           |                         |           |      |                    |
| Tuesday                          | 9 (15.00)  | —           |                         |           |      |                    |
| Wednesday                        | 8 (13.33)  | —           |                         |           |      |                    |
| Thursday                         | 8 (13.33)  | —           |                         |           |      |                    |
| Friday                           | 8 (13.33)  | —           |                         |           |      |                    |
| Saturday                         | 7 (11.67)  | —           |                         |           |      |                    |
| <b>Weekday—Inpatient</b>         |            |             | Chi square <sup>a</sup> | 2.0299    | .917 | 6                  |
| Sunday                           | —          | 20 (16.13)  |                         |           |      |                    |
| Monday                           | —          | 12 (9.68)   |                         |           |      |                    |
| Tuesday                          | —          | 15 (12.10)  |                         |           |      |                    |
| Wednesday                        | —          | 17 (13.71)  |                         |           |      |                    |
| Thursday                         | —          | 19 (15.32)  |                         |           |      |                    |
| Friday                           | —          | 19 (15.32)  |                         |           |      |                    |
| Saturday                         | —          | 22 (17.74)  |                         |           |      |                    |
| <b>Means-punch</b>               |            |             | Chi square              | 1.0591    | .303 | 1                  |
| No                               | 31 (51.67) | 74 (59.68)  |                         |           |      |                    |
| Yes                              | 29 (48.33) | 50 (40.32)  |                         |           |      |                    |
| <b>Means-slap</b>                |            |             | Chi square              | .3382     | .561 | 1                  |
| No                               | 57 (95.00) | 115 (92.74) |                         |           |      |                    |
| Yes                              | 3 (5.00)   | 9 (7.26)    |                         |           |      |                    |
| <b>Means - grab</b>              |            |             | Chi square              | 3.1920    | .074 | 1                  |
| No                               | 52 (86.67) | 117 (94.35) |                         |           |      |                    |
| Yes                              | 8 (13.33)  | 7 (5.65)    |                         |           |      |                    |
| <b>Means-hair pull</b>           |            |             | Chi square              | .1077     | .743 | 1                  |
| No                               | 59 (98.33) | 121 (97.58) |                         |           |      |                    |
| Yes                              | 1 (1.67)   | 3 (2.42)    |                         |           |      |                    |
| <b>Means-scratch</b>             |            |             | Chi square              | .0031     | .956 | 1                  |
| No                               | 56 (93.33) | 116 (93.55) |                         |           |      |                    |
| Yes                              | 4 (6.67)   | 8 (6.45)    |                         |           |      |                    |

(Continued)

**Physical Assault in Psychiatry Emergency Room - Supplemental Material****Table S5** Continued

| Variable                                                  | Psych ER   | Inpatient   | Test       | Statistic | <i>P</i> | Degrees of Freedom |
|-----------------------------------------------------------|------------|-------------|------------|-----------|----------|--------------------|
| <b>Means-kick</b>                                         |            |             | Chi square | 2.4305    | .119     | 1                  |
| No                                                        | 50 (83.33) | 113 (91.13) |            |           |          |                    |
| Yes                                                       | 10 (16.67) | 11 (8.87)   |            |           |          |                    |
| <b>Means-push</b>                                         |            |             | Chi square | 2.2255    | .136     | 1                  |
| No                                                        | 54 (90.00) | 101 (81.45) |            |           |          |                    |
| Yes                                                       | 6 (10.00)  | 23 (18.55)  |            |           |          |                    |
| <b>Means-spit</b>                                         |            |             | Chi square | .0665     | .796     | 1                  |
| No                                                        | 55 (91.67) | 115 (92.74) |            |           |          |                    |
| Yes                                                       | 5 (8.33)   | 9 (7.26)    |            |           |          |                    |
| <b>Means-bite</b>                                         |            |             | Chi square | 1.7548    | .185     | 1                  |
| No                                                        | 57 (95.00) | 122 (98.39) |            |           |          |                    |
| Yes                                                       | 3 (5.00)   | 2 (1.61)    |            |           |          |                    |
| <b>Means - projectile</b>                                 |            |             | Chi square | 1.4132    | .235     | 1                  |
| No                                                        | 55 (91.67) | 106 (85.48) |            |           |          |                    |
| Yes                                                       | 5 (8.33)   | 18 (14.52)  |            |           |          |                    |
| <b>Means-tackle</b>                                       |            |             | Chi square | .2783     | .598     | 1                  |
| No                                                        | 59 (98.33) | 123 (99.19) |            |           |          |                    |
| Yes                                                       | 1 (1.67)   | 1 (0.81)    |            |           |          |                    |
| <b>Means-charge/lunge</b>                                 |            |             | Chi square | 1.4687    | .226     | 1                  |
| No                                                        | 53 (88.33) | 116 (93.55) |            |           |          |                    |
| Yes                                                       | 7 (11.67)  | 8 (6.45)    |            |           |          |                    |
| <b>Means-sexual misconduct</b>                            |            |             | Chi square | 5.2528    | .022     | 1                  |
| No                                                        | 56 (93.33) | 123 (99.19) |            |           |          |                    |
| Yes                                                       | 4 (6.67)   | 1 (0.81)    |            |           |          |                    |
| <b>Means-other</b>                                        |            |             | Chi square | .5911     | .442     | 1                  |
| No                                                        | 55 (91.67) | 109 (87.90) |            |           |          |                    |
| Yes                                                       | 5 (8.33)   | 15 (12.10)  |            |           |          |                    |
| <b>Means-unspecified</b>                                  |            |             | Chi square | .3581     | .550     | 1                  |
| No                                                        | 53 (88.33) | 113 (91.13) |            |           |          |                    |
| Yes                                                       | 7 (11.67)  | 11 (8.87)   |            |           |          |                    |
| <b>Victim-patient</b>                                     |            |             | Chi square | .9329     | .334     | 1                  |
| No                                                        | 43 (71.67) | 80 (64.52)  |            |           |          |                    |
| Yes                                                       | 17 (28.33) | 44 (35.48)  |            |           |          |                    |
| <b>Victim-security officer</b>                            |            |             | Chi square | 10.5195   | .001     | 1                  |
| No                                                        | 33 (55.00) | 97 (78.23)  |            |           |          |                    |
| Yes                                                       | 27 (45.00) | 27 (21.77)  |            |           |          |                    |
| <b>Victim-doctor</b>                                      |            |             | Chi square | 2.5620    | .109     | 1                  |
| No                                                        | 54 (90.00) | 119 (95.97) |            |           |          |                    |
| Yes                                                       | 6 (10.00)  | 5 (4.03)    |            |           |          |                    |
| <b>Victim-medical student</b>                             |            |             |            |           |          |                    |
| No                                                        | 60 (100)   | 124 (100)   |            |           |          |                    |
| <b>Victim-physician's assistant or nurse practitioner</b> |            |             |            |           |          |                    |
| No                                                        | 60 (100)   | 124 (100)   |            |           |          |                    |
| <b>Victim-nurse</b>                                       |            |             | Chi square | .0076     | .931     | 1                  |
| No                                                        | 51 (85.00) | 106 (85.48) |            |           |          |                    |
| Yes                                                       | 9 (15.00)  | 18 (14.52)  |            |           |          |                    |
| <b>Victim-mental health worker</b>                        |            |             | Chi square | 12.0020   | .001     | 1                  |
| No                                                        | 57 (95.00) | 91 (73.39)  |            |           |          |                    |
| Yes                                                       | 3 (5.00)   | 33 (26.61)  |            |           |          |                    |
| <b>Victim-other</b>                                       |            |             | Chi square | .4793     | .489     | 1                  |
| No                                                        | 55 (91.67) | 117 (94.35) |            |           |          |                    |
| Yes                                                       | 5 (8.33)   | 7 (5.65)    |            |           |          |                    |
| <b>Intervention-IM antipsychotic</b>                      |            |             | Chi square | .0213     | .884     | 1                  |
| No                                                        | 20 (33.33) | 40 (32.26)  |            |           |          |                    |
| Yes                                                       | 40 (66.67) | 84 (67.74)  |            |           |          |                    |
| <b>Intervention-IM benzodiazepine</b>                     |            |             | Chi square | .0019     | .966     | 1                  |
| No                                                        | 39 (65.00) | 81 (65.32)  |            |           |          |                    |
| Yes                                                       | 21 (35.00) | 43 (34.68)  |            |           |          |                    |

(Continued)

## Lawrence, Rolin, Looney, et al.

Table S5 Continued

| Variable                                 | Psych ER   | Inpatient   | Test       | Statistic | <i>P</i> | Degrees of Freedom |
|------------------------------------------|------------|-------------|------------|-----------|----------|--------------------|
| <b>Intervention-PO antipsychotic</b>     |            |             | Chi square | .0578     | .810     | 1                  |
| No                                       | 45 (75.00) | 95 (76.61)  |            |           |          |                    |
| Yes                                      | 15 (25.00) | 29 (23.39)  |            |           |          |                    |
| <b>Intervention-PO benzodiazepine</b>    |            |             | Chi square | 1.2051    | .272     | 1                  |
| No                                       | 48 (80.00) | 107 (86.29) |            |           |          |                    |
| Yes                                      | 12 (20.00) | 17 (13.71)  |            |           |          |                    |
| <b>Intervention-security involvement</b> |            |             | Chi square | 2.7198    | .099     | 1                  |
| No                                       | 5 (8.33)   | 21 (17.50)  |            |           |          |                    |
| Yes                                      | 55 (91.97) | 99 (82.50)  |            |           |          |                    |
| <b>Intervention-manual hold</b>          |            |             | Chi square | 6.7777    | .009     | 1                  |
| No                                       | 33 (55.98) | 93 (75.00)  |            |           |          |                    |
| Yes                                      | 26 (44.07) | 31 (25.00)  |            |           |          |                    |
| <b>Intervention-mechanical restraint</b> |            |             | Chi square | 1.8764    | .171     | 1                  |
| No                                       | 50 (83.33) | 112 (90.32) |            |           |          |                    |
| Yes                                      | 10 (16.67) | 12 (9.68)   |            |           |          |                    |
| <b>Intervention-seclusion</b>            |            |             | Chi square | 2.4869    | .115     | 1                  |
| No                                       | 60 (100)   | 119 (95.97) |            |           |          |                    |
| Yes                                      | 0 (0)      | 5 (4.03)    |            |           |          |                    |

Data are presented as n (%). Psych ER: *n* = 60 incidents; Inpatient: *n* = 124 incidents.

<sup>a</sup> Null hypothesis was that assaults were equally distributed across all time periods.

Psych ER, psychiatry emergency room; MOAS, Modified Overt Aggression Scale; IM, intramuscular; PO, *per os* (oral).

**Physical Assault in Psychiatry Emergency Room - Supplemental Material**

**Table S6** All Demographic and Clinical Characteristics of Subjects

|                                                           | Psychiatry<br>Emergency<br>Room<br>Subjects with<br>Incident<br>Reports<br>(n = 55) | Inpatients<br>with Incident<br>Reports<br>(n = 100) | Psychiatry<br>Emergency<br>Room Subjects<br>with No Incident<br>Reports (n = 110) | Test Statistic<br>(degrees of free-<br>dom), overall P | Psychiatry Emergency<br>Room Subjects with<br>Incident Reports versus<br>Inpatients with<br>Incident Reports: Test<br>Statistic (degrees of<br>freedom), P | Psychiatry Emergency<br>Room Subjects with<br>Incident Reports versus<br>Psychiatry Emergency<br>Room Subjects with<br>No Incident Reports:<br>Test Statistic (degrees<br>of freedom), P |
|-----------------------------------------------------------|-------------------------------------------------------------------------------------|-----------------------------------------------------|-----------------------------------------------------------------------------------|--------------------------------------------------------|------------------------------------------------------------------------------------------------------------------------------------------------------------|------------------------------------------------------------------------------------------------------------------------------------------------------------------------------------------|
| Age, y                                                    | 37.5 (14.3)                                                                         | 33.2 (12.5)                                         | 41.4 (15.1)                                                                       | F (2,262) = 6.38 <sup>a</sup><br>P = 0.0020            | t (153) = 1.88 <sup>b</sup><br>P = 0.062                                                                                                                   | t (163) = 3.51 <sup>b</sup><br>P = 0.0006                                                                                                                                                |
| Male gender                                               | 38 (69.1)                                                                           | 65 (65.0)                                           | 69 (62.7)                                                                         | $\chi^2$ (2) = 0.65 <sup>c</sup><br>P = 0.72           |                                                                                                                                                            |                                                                                                                                                                                          |
| Homeless                                                  | 19 (34.6)                                                                           | 36 (36.0)                                           | 33 (30.0)                                                                         | $\chi^2$ (2) = 0.91 <sup>c</sup><br>P = 0.64           |                                                                                                                                                            |                                                                                                                                                                                          |
| Employed                                                  | 9 (17.0)                                                                            | 12 (12.0)                                           | 30 (28.9)                                                                         | $\chi^2$ (2) = 9.44 <sup>c</sup><br>P = 0.009          | $\chi^2$ (1) = 0.73 <sup>c</sup><br>P = 0.39                                                                                                               | $\chi^2$ (1) = 2.65 <sup>c</sup><br>P = 0.104                                                                                                                                            |
| Prior arrests                                             | 31 (58.5)                                                                           | 59 (60.2)                                           | 46 (43.0)                                                                         | $\chi^2$ (2) = 6.97 <sup>c</sup><br>P = 0.031          | $\chi^2$ (1) = 0.042 <sup>c</sup><br>P = 0.84                                                                                                              | $\chi^2$ (1) = 3.41 <sup>c</sup><br>P = 0.065                                                                                                                                            |
| Prior state<br>hospitalization                            | 7 (12.7)                                                                            | 7 (7.1)                                             | 5 (4.6)                                                                           | $\chi^2$ (2) = 3.62 <sup>c</sup><br>P = 0.16           |                                                                                                                                                            |                                                                                                                                                                                          |
| Current ACT team                                          | 6 (11.1)                                                                            | 8 (8.0)                                             | 4 (3.6)                                                                           | $\chi^2$ (2) = 3.54 <sup>c</sup><br>P = 0.17           |                                                                                                                                                            |                                                                                                                                                                                          |
| Current AOT order                                         | 6 (11.1)                                                                            | 5 (5.1)                                             | 2 (1.8)                                                                           | $\chi^2$ (2) = 6.59 <sup>c</sup><br>P = 0.037          | $\chi^2$ (1) = 1.92 <sup>c</sup><br>P = 0.17                                                                                                               | $\chi^2$ (1) = 6.66 <sup>c</sup><br>P = 0.010                                                                                                                                            |
| Prior hospitalizations                                    |                                                                                     |                                                     |                                                                                   | $\chi^2$ (2) = 5.85 <sup>c</sup><br>P = 0.054          |                                                                                                                                                            |                                                                                                                                                                                          |
| 0 to 1                                                    | 9 (16.4)                                                                            | 20 (20.2)                                           | 34 (31.5)                                                                         |                                                        |                                                                                                                                                            |                                                                                                                                                                                          |
| 2 or more                                                 | 46 (83.6)                                                                           | 79 (79)                                             | 74 (68.5)                                                                         |                                                        |                                                                                                                                                            |                                                                                                                                                                                          |
| History of violence                                       | 38 (70.4)                                                                           | 63 (65.6)                                           | 41 (39.8)                                                                         | $\chi^2$ (2) = 19.11 <sup>c</sup><br>P < 0.001         | $\chi^2$ (1) = 0.35 <sup>c</sup><br>P = 0.56                                                                                                               | $\chi^2$ (1) = 13.24 <sup>c</sup><br>P < 0.001                                                                                                                                           |
| Presented with thoughts<br>to harm self                   | 25 (45.5)                                                                           | 44 (44.9)                                           | 58 (52.7)                                                                         | $\chi^2$ (2) = 1.50 <sup>c</sup><br>P = 0.47           |                                                                                                                                                            |                                                                                                                                                                                          |
| Presented with thoughts<br>to harm others                 | 27 (49.1)                                                                           | 50 (50.5)                                           | 14 (12.7)                                                                         | $\chi^2$ (2) = 39.50 <sup>c</sup><br>P < 0.001         | $\chi^2$ (1) = 0.028 <sup>c</sup><br>P = 0.87                                                                                                              | $\chi^2$ (1) = 25.96 <sup>c</sup><br>P < 0.001                                                                                                                                           |
| Recent alcohol use                                        | 15 (27.3)                                                                           | 28 (28.0)                                           | 25 (22.7)                                                                         | $\chi^2$ (2) = 0.86 <sup>c</sup><br>P = 0.65           |                                                                                                                                                            |                                                                                                                                                                                          |
| Recent cannabinoid use                                    | 25 (45.5)                                                                           | 39 (39.0)                                           | 29 (26.4)                                                                         | $\chi^2$ (2) = 6.94 <sup>c</sup><br>P = 0.031          | $\chi^2$ (2) = 0.61 <sup>c</sup><br>P = 0.44                                                                                                               | $\chi^2$ (2) = 6.07 <sup>c</sup><br>P = 0.014                                                                                                                                            |
| Recent cocaine use                                        | 14 (25.5)                                                                           | 14 (14.0)                                           | 33 (30.0)                                                                         | $\chi^2$ (2) = 7.80 <sup>c</sup><br>P = 0.020          | $\chi^2$ (2) = 3.15 <sup>c</sup><br>P = 0.076                                                                                                              | $\chi^2$ (2) = 0.37 <sup>c</sup><br>P = 0.54                                                                                                                                             |
| Recent amphetamine<br>use                                 | 3 (5.5)                                                                             | 4 (4.0)                                             | 4 (3.6)                                                                           | $\chi^2$ (2) = 0.31 <sup>c</sup><br>P = 0.86           |                                                                                                                                                            |                                                                                                                                                                                          |
| Recent PCP use                                            | 1 (1.8)                                                                             | 5 (5.0)                                             | 5 (4.6)                                                                           | $\chi^2$ (2) = 0.98 <sup>c</sup><br>P = 0.61           |                                                                                                                                                            |                                                                                                                                                                                          |
| Recent opioid use                                         | 4 (7.3)                                                                             | 9 (9.0)                                             | 9 (8.2)                                                                           | $\chi^2$ (2) = 0.14 <sup>c</sup><br>P = 0.93           |                                                                                                                                                            |                                                                                                                                                                                          |
| Other recent drug use                                     | 2 (3.6)                                                                             | 4 (4.0)                                             | 2 (1.8)                                                                           | $\chi^2$ (2) = 0.94 <sup>c</sup><br>P = 0.62           |                                                                                                                                                            |                                                                                                                                                                                          |
| Any recent drug use                                       | 34 (61.8)                                                                           | 55 (55.0)                                           | 64 (58.2)                                                                         | $\chi^2$ (2) = 0.69 <sup>c</sup><br>P = 0.71           |                                                                                                                                                            |                                                                                                                                                                                          |
| Schizophrenia,<br>schizoaffective, or<br>bipolar disorder |                                                                                     |                                                     |                                                                                   | $\chi^2$ (4) = 38.09 <sup>c</sup><br>P < 0.001         | $\chi^2$ (2) = 1.50 <sup>c</sup><br>P = 0.47                                                                                                               | $\chi^2$ (2) = 31.62 <sup>c</sup><br>P < 0.001                                                                                                                                           |
| None                                                      | 6 (10.9)                                                                            | 14 (14.0)                                           | 37 (33.6)                                                                         |                                                        |                                                                                                                                                            |                                                                                                                                                                                          |
| Yes, without manic<br>symptoms                            | 22 (40.0)                                                                           | 47 (47.0)                                           | 61 (55.5)                                                                         |                                                        |                                                                                                                                                            |                                                                                                                                                                                          |
| Yes, with manic<br>symptoms                               | 27 (49.1)                                                                           | 39 (39.0)                                           | 12 (10.9)                                                                         |                                                        |                                                                                                                                                            |                                                                                                                                                                                          |

(Continued)

Lawrence, Rolin, Looney, et al.

Table S6 Continued

|                                                                                       | Psychiatry<br>Emergency<br>Room<br>Subjects with<br>Incident<br>Reports<br>(n = 55) | Inpatients<br>with Incident<br>Reports<br>(n = 100) | Psychiatry<br>Emergency<br>Room Subjects<br>with No Incident<br>Reports (n = 110) | Test Statistic<br>(degrees of free-<br>dom), overall P | Psychiatry Emergency<br>Room Subjects with<br>Incident Reports versus<br>Inpatients with<br>Incident Reports: Test<br>Statistic (degrees of<br>freedom), P | Psychiatry Emergency<br>Room Subjects with<br>Incident Reports versus<br>Psychiatry Emergency<br>Room Subjects with<br>No Incident Reports:<br>Test Statistic (degrees<br>of freedom), P |
|---------------------------------------------------------------------------------------|-------------------------------------------------------------------------------------|-----------------------------------------------------|-----------------------------------------------------------------------------------|--------------------------------------------------------|------------------------------------------------------------------------------------------------------------------------------------------------------------|------------------------------------------------------------------------------------------------------------------------------------------------------------------------------------------|
| Unipolar depression                                                                   | 1 (1.8)                                                                             | 6 (6.0)                                             | 17 (15.5)                                                                         | $\chi^2 (2) = 10.10^c$<br>$P = 0.006$                  | $\chi^2 (2) = 1.44^c$<br>$P = 0.23$                                                                                                                        | $\chi^2 (2) = 7.02^c$<br>$P = 0.008$                                                                                                                                                     |
| Posttraumatic stress<br>disorder                                                      | 3 (5.5)                                                                             | 10 (10.0)                                           | 12 (10.9)                                                                         | $\chi^2 (2) = 1.34^c$<br>$P = 0.51$                    |                                                                                                                                                            |                                                                                                                                                                                          |
| Dementia                                                                              | 0 (0)                                                                               | 4 (4.0)                                             | 2 (1.8)                                                                           | $\chi^2 (2) = 2.73^c$<br>$P = 0.26$                    |                                                                                                                                                            |                                                                                                                                                                                          |
| Intellectual disability                                                               | 5 (9.1)                                                                             | 11 (11.0)                                           | 1 (0.9)                                                                           | $\chi^2 (2) = 9.71^c$<br>$P = 0.008$                   | $\chi^2 (2) = 0.14^c$<br>$P = 0.71$                                                                                                                        | $\chi^2 (2) = 7.00^c$<br>$P = 0.008$                                                                                                                                                     |
| Borderline personality<br>disorder or traits                                          | 2 (3.6)                                                                             | 7 (7.0)                                             | 3 (2.7)                                                                           | $\chi^2 (2) = 2.34^c$<br>$P = 0.31$                    |                                                                                                                                                            |                                                                                                                                                                                          |
| Antisocial personality<br>disorder or traits                                          | 7 (12.7)                                                                            | 3 (3.0)                                             | 5 (4.6)                                                                           | $\chi^2 (2) = 6.73^c$<br>$P = 0.035$                   | $\chi^2 (2) = 5.56^c$<br>$P = 0.018$                                                                                                                       | $\chi^2 (2) = 3.64^c$<br>$P = 0.056$                                                                                                                                                     |
| Unspecified personality<br>disorder or traits                                         | 1 (1.8)                                                                             | 7 (7.0)                                             | 4 (3.6)                                                                           | $\chi^2 (2) = 2.55^c$<br>$P = 0.28$                    |                                                                                                                                                            |                                                                                                                                                                                          |
| Any borderline,<br>antisocial, or<br>unspecified<br>personality traits or<br>disorder | 8 (14.6)                                                                            | 16 (16.0)                                           | 11 (10.0)                                                                         | $\chi^2 (2) = 1.751^c$<br>$P = 0.42$                   |                                                                                                                                                            |                                                                                                                                                                                          |
| Prior traumatic brain<br>injury                                                       | 3 (5.5)                                                                             | 5 (5.0)                                             | 3 (2.7)                                                                           | $\chi^2 (2) = 0.98^c$<br>$P = 0.61$                    |                                                                                                                                                            |                                                                                                                                                                                          |

Data are presented as n (%) or mean ± SD. Subjects include psychiatry emergency room patients with incident reports, inpatients with incident reports, and psychiatry emergency room patients with no incident reports. Note that Table 2 in the article reports only variables with statistically significant differences across groups.

<sup>a</sup> Analysis of variance for parametric continuous variables.

<sup>b</sup> Post hoc analyses without adjustment.

<sup>c</sup> Chi-square test for categorical variables.

ACT, assertive community treatment; AOT, assisted outpatient treatment.
